# Supplementary material
Source: Springer Nature journal article supplement (https://www.springermedizin.de/resource/supplementary/12885_2011_2883_MOESM15_ESM.pdf/9462152)

**A**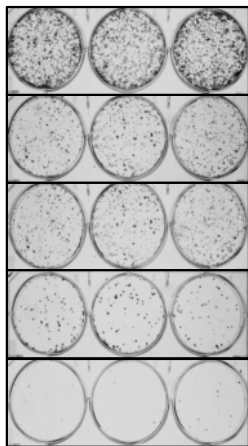

Control  
Colony count  $560 \pm 123$

Docetaxel  
(0.6nM)  
Colony count  $234 \pm 78$

Carboplatin  
(40 $\mu$ M)  
Colony count  $202 \pm 89$

PNP-GDEPT  
(Ad/CMV/PNP at 4 moi  
+ 2.7 $\mu$ M Fludarabine)  
Colony count  $123 \pm 67$

Tri-combination  
(Docetaxel, Carboplatin  
And PNP-GDEPT)  
Colony count  $13 \pm 7$

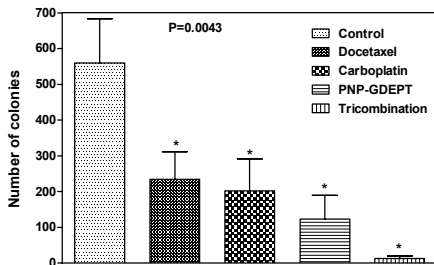**B**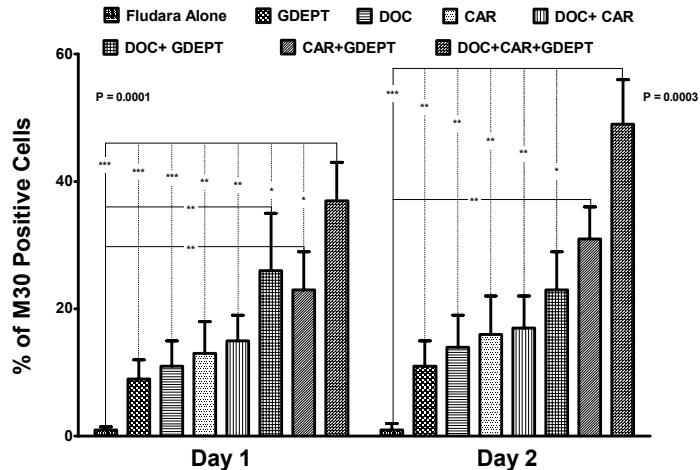**C**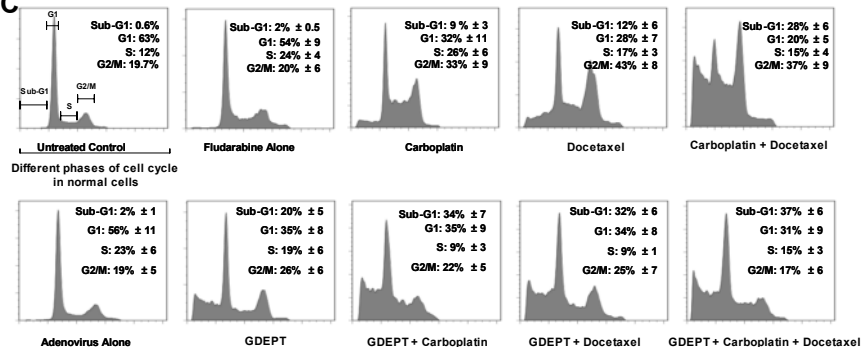

Supplement: MOESM15 [file 9462152]
